## Modeling Cell Biological Features of Meiotic Chromosome Pairing

Erik J. Navarro<sup>1</sup>, Wallace F. Marshall<sup>2</sup>, Jennifer C. Fung<sup>1\*</sup>

**1** Department of Obstetrics, Gynecology and Reproductive Sciences and Center of Reproductive Sciences, University of California, San Francisco, California, United States of America

**2** Department of Biochemistry and Biophysics, University of California, San Francisco, California, United States of America

\* [jennifer.fung@ucsf.edu](mailto:jennifer.fung@ucsf.edu)

### Abstract

During meiosis, homologous chromosomes become associated side by side in a process known as homologous chromosome pairing. Pairing requires long range chromosome motion through a nucleus that is full of other chromosomes. It remains unclear how the cell manages to align each pair of chromosomes quickly while mitigating and resolving interlocks. Here, we use a coarse-grained molecular dynamics model to investigate how specific features of meiosis, including motor-driven telomere motion, nuclear envelope interactions, and increased nuclear size, affect the rate of pairing and the mitigation/resolution of interlocks. By creating *in silico* versions of three yeast strains and comparing the results of our model to experimental data, we find that a more distributed placement of pairing sites along the chromosome is necessary to replicate experimental findings. Active motion of the telomeric ends speeds up pairing only if binding sites are spread along the chromosome length. Adding a meiotic bouquet significantly speeds up pairing but does not significantly change the number of interlocks. An increase in nuclear size slows down pairing while greatly reducing the number of interlocks. Interestingly, active forces increase the number of interlocks, which raises the question: How do these interlocks resolve? Our model gives us detailed movies of interlock resolution events which we then analyze to build a step-by-step recipe for interlock resolution. In our model, interlocks must first translocate to the ends, where they are held in a quasi-stable state by a large number of paired sites on one side. To completely resolve an interlock, the telomeres of the involved chromosomes must come in close proximity so that the cooperativity of pairing coupled with random motion causes the telomeres to unwind. Together our results indicate that computational modeling of homolog pairing provides insight into the specific cell biological changes that occur during meiosis.

### Author Summary

Early in meiosis, homologous chromosomes must find each other within the crowded nuclear space and become aligned along their entire length in a process known as homologous chromosome pairing. It remains unclear how the cell manages to align each pair of chromosomes quickly while mitigating and resolving interlocks. Here, we study this process by using a computational model. Our model attempts to capture the large-scale cell biological picture of meiotic pairing including the random initial 3D search, active motion of the chromosome ends, and meiosis specific constraints such as

telomere attachment to the nuclear envelope. We use our model to study how these different features of meiosis affect the rate of pairing and the mitigation/resolution of interlocks. Importantly, our model gives us detailed movies of interlock resolution events, which we then analyze to build a step-by-step recipe for interlock resolution. We believe computational modeling of homolog pairing provides valuable insight into this complex biological process.

## Introduction

Meiotic chromosome pairing is a necessary first step for meiotic recombination and segregation. At the start of meiosis, homologous chromosomes must locate each other in the crowded nuclear space then become aligned along their entire length in a process known as homologous chromosome pairing (**Fig 1A**). Once sections of the chromosomes are paired, a complex of proteins which forms the synaptonemal complex assembles between paired regions of the chromosomes and holds them together [reviewed in Zickler & Kleckner 2015]. This tight end-to-end alignment after the completion of synapsis allows for recombination, in which information is exchanged between the maternal and paternal homologs and generates crossovers which promote faithful chromosome segregation during meiosis I.

Despite the importance of pairing in the proliferation of sexually reproducing organisms, very little is known about chromosome pairing as a physical process. Unlike many molecular recognition processes which occur at a nanometer length scale, meiotic pairing requires motion on the micron length scale, and thus faces special challenges owing to the large size and dense packing of the chromosomes within the nucleus (**Fig 1B**). The homology search process thus involves not only a huge number of individual homology-assessment interactions but also a physical challenge of moving such large macromolecular structures over long distances in a densely tangled environment.

Several previous computational models have been described to represent meiotic homolog pairing [Penfold 2012, Takao 2019, Marshall & Fung 2016, Marshall & Fung 2019, Newman 2021, Child 2021]. These models have, in general, ignored the possibility of entanglement, by assuming that chromosomes are able to pass through one another. Such a "phantom polymer" assumption has been supported on theoretical grounds for mitotic chromosomes based on estimates of topoisomerase II (topo II) mediated strand passage rates [Sikorav 1994]. However, there are several concerns about making such an assumption for meiotic chromosomes. First, in contrast to interphase chromosomes, consisting of a single DNA double helix, each meiotic homolog consists of two sister chromatids, closely cohering together. In order to pass one meiotic homolog through another, it would be necessary to pass a pair of double helices through another pair of double helices, and this is not a known activity of topo II. While it is known that topo II is upregulated during meiosis [Cobb 1997] and that mutations in topo II lead to meiotic defects [Rose Holm 1993; Hartsuiker 1998], there is, to our knowledge, no direct demonstration that topo II can pass one meiotic chromosome through another. Genetic experiments show that topo II mutants have many different effects on meiosis, for example affecting recombination itself, [Hartsuiker 1998; Heldrich 2020], hence neither the upregulation of topo II in meiosis, nor the defects that result from topo II mutations, necessarily show a specific role in passing chromosomes through each other, and may instead reflect other roles of topo II for example in chromatin loop organization. Moreover, in many organisms, by the leptotene stage in meiosis when chromosomes undergo pairing, a protein-based axial element has already assembled on each homolog [Zickler 1977; von Wettstein 1984; Lu 1993; Pattabiraman 2017]. The proteins that make up the axial element self-assemble into continuous protein filaments [Syrjänen 2017; West 2019]. In cases where the axial element has already assembled by

the time pairing takes place, it is obviously not possible for topo II to catalyze the passage of these protein-based linear elements. Finally, we note that the persistence of interlocks through pachytene [Zickler 1977; Rasmussen 1980] demonstrates the inability of the chromosomes to simply pass through one another.

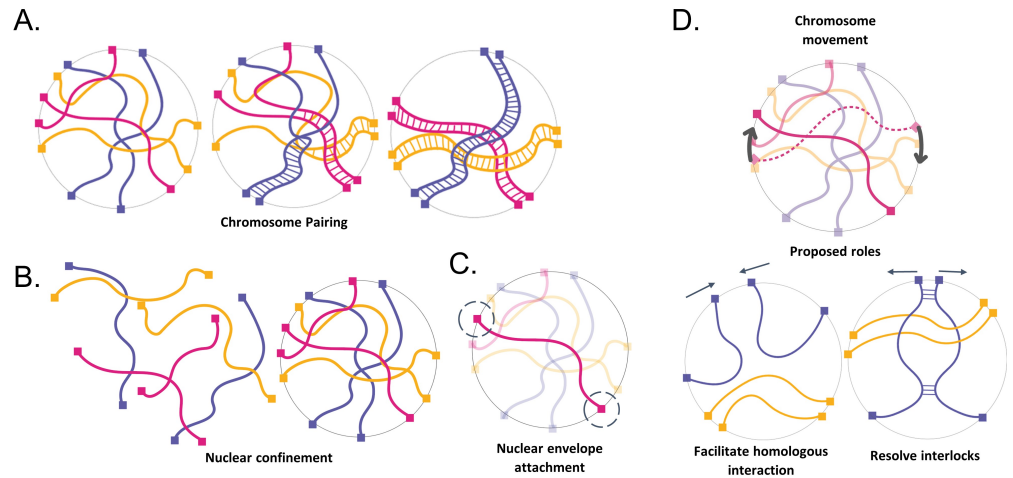

**Fig 1.** The physical context of meiotic pairing. (A) Cartoon schematic of chromosome pairing (B) Cartoon schematic of nuclear confinement (C) Cartoon schematic of telomere attachment to the nuclear envelope (D) chromosome movement and proposed roles.

One potential solution to the problem of moving chromosomes through a tangled mass of other chromosomes would be reptation - the snake-like slithering motion of a polymer through a network of other polymers. However, reptation is extremely slow compared to free diffusion [de Gennes 1977]. In principle, molecular motors could provide a driving force to accelerate chromosome motion (**Fig 1C**). Indeed, meiotic chromosomes are subject to forces generated by myosin or dynein motors, depending on the species, which are able to exert forces on telomeres attached to the nuclear envelope (NE). This attachment is provided by SUN/KASH proteins that span the entire NE [reviewed in Starr 2010] so that the chromosome ends are pulled back and forth in the plane of the nuclear membrane by motor proteins outside the nucleus [Chikashige 1994; Scherthan 2007; Conrad 2008; Koszul 2008; Sato 2009]. It has been hypothesized that this active motion aids the pairing process either by increasing collisions between homologous loci, by testing homology, and/or by helping to resolve interlocks that occur as part of the pairing process (**Fig 1D**) [Conrad 2008; Kosaka 2008; Mine-Hattab & Rothstein 2012; Marshall and Fung, 2016]. Mutations in telomere coupling to the actin cytoskeleton in yeast lead to reduced encounters between homologous loci [Lui 2013]. Although reduction in motion leads to delays in completing meiosis [Brown 2011; Rao 2011], it can also cause an increase in total crossover number [Kosaka 2008, Wanat 2008]. In fission yeast, when active motion is transiently stopped, initial pairing is slower, but then hyperstable pairing associations form that appear to involve unresolvable recombination events which eventually block proper chromosome segregation [Chacón 2016]. Thus, while rapid telomere motions clearly affect the meiotic process, their exact role remains unclear.

Clearly, there are still many unanswered questions about how meiotic chromosome

pairing occurs. Part of the difficulty of studying this process experimentally using in vivo fluorescence microscopy comes from the fact that even in an organism with relatively short chromosomes such as *S. cerevisiae*, pairing is still a slow step in meiosis, taking hours to complete. At these timescales, photobleaching & phototoxicity are problematic, even when using very low-intensity light. The difficulty of studying this process experimentally coupled with the fact that very little is known about pairing as a physical process, motivated us to study this process using a computational model. Our main goal when building our model was to capture the large-scale topology of the pairing problem, not necessarily the exact molecular details of pairing/unpairing.

## Methods

We modeled meiotic chromosome dynamics using a coarse-grained molecular dynamics model. In our model framework, each chromosome is a list of nodes representing beads connected by springs, with each node subjected to Langevin random forces. To solve the system numerically, we use the thermostat described in [Schneider 1978] to model the interaction of each node with an implicit solvent, and NVE integration to update the velocity and position of each atom at every timestep. The force on each atom then has the form:

$$F = F_r + F_f + F_s + F_{lj}$$

$$F_f = - \left( \frac{m}{\zeta} \right) * v$$

$$F_r \propto \sqrt{\frac{K_b T m}{\Delta t \zeta}}$$

$$F_s = K(r - r_0)^2$$

$$F_{lj} = -\nabla 4 \in \left( \left( \frac{\sigma}{r} \right)^{12} - \left( \frac{\sigma}{r} \right)^6 \right), r < r_c$$

Where  $F_r$  is the Langevin random force due to interactions with the solvent,  $F_f$  is the frictional force term, which is proportional to the velocity of the node,  $F_s$  is a harmonic spring potential which provides the restoring spring force between adjacent nodes, and  $F_{lj}$  is the Leonard Jones force to keep nodes from overlapping in space. The LJ potential has both a repulsive and an attractive term, but the cutoff radius is set to be the minimum of the potential so that nodes only experience the repulsive portion. All simulations are carried out using the molecular dynamics package LAMMPS [Thompson 2022] and the equations describing the forces have been included here for completeness.

At the beginning of the simulation, each polymer chain representing a chromosome is initialized on a cubic lattice. The polymer then goes through two separate phases of equilibration. During the first equilibration, the maximum distance each node can move in a single timestep is capped to a distance 1/10 the size of the node. This allows the polymers to physically separate in 3D space and slowly leave the tightly packed initial lattice configuration. During the second equilibration, the distance each node can move in a single timestep is now uncapped, which serves to randomly orient the polymers in

space. The length of the second equilibration was chosen such that subsequent measurements of the average end-to-end distance matched theoretical predictions. In other words, we have equilibrated long enough that the polymer has “forgotten” it was initially packed in a lattice. The end of the second equilibration marks our initial timestep ( $t = 0$ , and all physical measurements begin from this point.

Unless otherwise stated, all simulations run for ten million timesteps. To constrain the model chromosomes to a nucleus-like region, we use an indenter to keep all nodes in the simulation confined to a sphere with a chosen radius. The indenter exerts a force on all nodes:

$$F(r) = -K(r - R)^2$$

Where  $K$  is a force constant,  $r$  is the distance from the node to the center of the indenter, and  $R$  is the indenter radius. To keep the ends of the chromosomes confined to the nuclear surface, we use the constraint algorithm described in [Paquay 2016], which ensures that the net force on each telomeric node is always perpendicular to the surface of the constraining sphere. Rapid telomere movements are modeled as randomly oriented large (relative to thermal forces) persistent forces that drag the telomeric nodes along the nuclear surface. For simulations involving a meiotic bouquet, an additional force is exerted on the telomeric nodes that tend to keep these nodes in a subregion of the nuclear surface. This force is modeled as a weak constant acceleration (force/mass) that drives the nodes toward a single point on the nuclear surface.

For the purpose of pairing, every node that makes up a chromosome is enumerated such that the first node along a polymer chain is node one, and the second node is node two, etc. Pairing occurs when a node on one polymer chain comes within a specified capture distance of the corresponding node on the homologous chain. Pairing is modeled by binding two nodes together with a harmonic spring. The creation of this spring occurs with a specified probability, but only when two nodes come within the specified capture distance. The pairing of two nodes is reversible and falls apart with a specified dissociation probability.

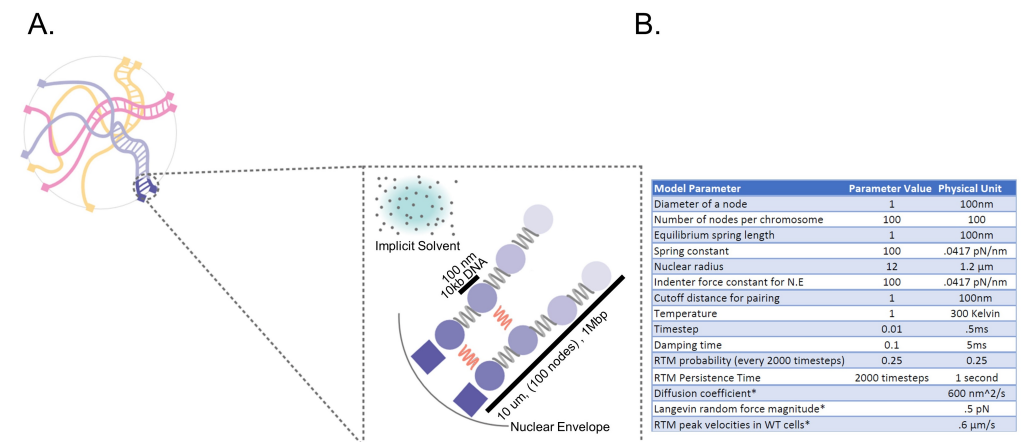

**Fig 2.** Simulating Meiotic Chromosome Pairing (A) To model meiotic chromosome pairing, we use bead spring polymers undergoing Langevin dynamics. (B) Model parameters used in the simulation.

## Parameter Choice

132

The intent of our model is not to represent the chromosomes of any species in exact detail, instead, we take a toy model approach to capture the most important physical aspects associated with meiotic pairing: 1) chromosomes are long linear polymers. 2) chromosomes are confined to a nuclear volume. 3) the ends of each chromosome are attached to the nuclear envelope where they experience forces that drag them along the nuclear surface. 4) each chromosome needs to find its homolog partner and become aligned from end to end. 5) pairing needs to be completed while avoiding or resolving topological interlocks.

133  
134  
135  
136  
137  
138  
139  
140

Taken together this represents a unique and complex physical situation that lends itself well to this type of model. Our parameter choices thus reflect order of magnitude estimates for the size/density parameters in the simulations, while energy and time scales are chosen such that the diffusion coefficient of our simulated polymers approximately matches experimental measurements of the diffusion coefficient of chromatin.

141  
142  
143  
144  
145  
146

## Nuclear Radius

147

To obtain order of magnitude estimates for size and length scales, we use *Saccharomyces cerevisiae* (budding yeast) as a representative organism since it is a widely used model organism in experimental studies of meiotic pairing. The radius of a meiotic yeast nucleus is approximately 1.2 microns. We take the fundamental unit of length in our simulations to be 100 nm, which makes the nuclear radius equal to 12 of these fundamental units.

148  
149  
150  
151  
152  
153

## Polymer Node Size

154

The persistence length of interphase yeast chromatin has been measured to be approximately 50 nm [Dekker 2008]. While the chromosomes condense significantly throughout the course of meiosis, pairing begins very early in prophase while the chromosomes are largely uncondensed. In standard random chain polymer models, the persistence length is equal to half the Kuhn segment length of the chain. We therefore take the diameter of a node, which represents the segment length of the random chain model, in our simulation to be 100 nm, which corresponds to a length of 1 in our model units.

155  
156  
157  
158  
159  
160  
161  
162

## Chromosome Length

163

After the formation of the synaptonemal complex, the largest yeast chromosome has been observed to have a length of about 3 microns [Voelkel-Meiman 2012]. Since the synaptonemal complex forms after pairing, and thus after significant chromosomal condensation, we choose a slightly larger 10 microns as our chromosome length, which means each chromosome is made up of 100 nodes in our model framework.

164  
165  
166  
167  
168

## Chromosome Number

169

We simulate four chromosomes (two pairs of homologs) in order to be able to investigate the potential for interlocks between non-homologous chromosomes. With our assumptions of chromosome length, polymer node size, and nuclear volume, this results in a volume fraction of chromatin of 5%, which is comparable to prior estimates [Dekker 2013].

170  
171  
172  
173  
174

## Capture Distance 175

Since our simulations include excluded volume effects that will prevent the nodes from overlapping, we take the capture distance for pairing to be the diameter of a node (100 nm). This means that in order to pair, two homologous nodes must physically touch. 176  
177  
178

## Damping Time & Temperature 179

When choosing values for the temperature and damping time, there are two timescales of interest. The first is the timescale on which the momentum dissipates, this timescale is set in LAMMPS directly: 180  
181  
182

$$\tau_m = \zeta$$

There is also a timescale (called the Brownian timescale) in which the particle diffuses a distance comparable to its own size 183  
184

$$\tau_{bd} = \frac{\sigma^2 m}{\zeta K_b T}$$

The Brownian regime of Langevin dynamics occurs when: 185

$$\tau_{bd} \ll \tau_m$$

This is the regime accurate for high viscosities, which chromatin diffusion in the nucleus is thought to occupy. Our primary concern when choosing the temperature value and damping time is to ensure we remain within this regime. To do this, we set the damping time equal to .1 (5 milliseconds in physical units) and the temperature to 1 (~300 Kelvin in physical units), which gives us a Brownian timescale that is many times larger than the momentum dissipation timescale. We note that these parameter choices also give us a reasonable measurement of the simulated chromatin diffusion coefficient. We calculate the mean squared displacement (MSD) of the ten centermost nodes in each polymer and plot the MSD vs time. We then fit a line to the linear region of the resulting plot and obtain a diffusion coefficient of  $600\text{nm}^2/\text{s}$ , which is comparable to the experimentally measured diffusion coefficient of  $500\text{nm}^2/\text{s}$  for yeast chromatin measured in vivo [Marshall 1997]. 186  
187  
188  
189  
190  
191  
192  
193  
194  
195  
196  
197

## Telomeric Velocities 198

In the WT strain of budding yeast, the telomeres experience rapid pulls due to coupling with motor proteins outside the nucleus. These pulls have been experimentally measured to peak at approximately  $\sim 0.6 \mu\text{m}/\text{s}$  in most cells [Conrad 2008]. In the *csm4* $\Delta$  strain (which lacks the rapid telomere movements) the telomeres have been measured to have an average velocity of about  $\sim 0.05 \mu\text{m}/\text{s}$  [Conrad 2008]. In the *ndj1* $\Delta$  strain, the ends become detached from the nuclear envelope and thus are free to diffuse through the nucleus [Trelles-Sticken 2000]. 199  
200  
201  
202  
203  
204  
205

To model these three strains in silico, we set our telomeric velocities accordingly. In our simulated WT strain, the telomeres undergo rapid movement along the nuclear envelope which peaks at approximately  $\sim 0.6 \mu\text{m}/\text{s}$ . The telomeres in our simulated *csm4* $\Delta$  strain lack these rapid movements, and have an average velocity of around  $\sim 0.05 \mu\text{m}/\text{s}$ . We model the *ndj1* $\Delta$  strain by removing both the constraint that keeps the telomeres attached to the nuclear envelope, and the rapid telomere movements. 206  
207  
208  
209  
210  
211

## Plots 212

Our results are reported using two different types of plots, which were generated as follows. 213  
214

### Percent of paired nodes vs time:

215

These plots were created by averaging the percentage of paired nodes at each timestep and plotting the results as a function of time. Error bars represent the 95% confidence interval on the mean value for each timepoint. N=100 simulations were used to create each plot. Timepoints with non-overlapping confidence intervals are deemed to be significantly different.

216  
217  
218  
219  
220

### Percent of simulations with interlocks:

221

These plots were created from a binary experiment in which (after the end of the simulation) each simulation is assessed for the existence of an interlock. This assessment is done automatically after the end of each simulation by forcing all nodes to pair. Simulations that contain interlocks will fail to finish pairing and are then counted. Error bars are estimated using the 95% binomial proportion confidence interval. Bars with non-overlapping confidence intervals are deemed to be statistically significant. N=100 simulations were used to create each plot, except for the case of Figure 8B, where it was necessary to use N=200 simulations to establish statistical significance. Statistical significance or lack thereof is determined by using a two proportion z-test. In the case that error bars overlap and are not statistically significant, we have labeled the plots accordingly.

222  
223  
224  
225  
226  
227  
228  
229  
230  
231  
232

## Results

233

234

### Pairing sites that are spread out along the length of the chromosomes correlate best with experimental data from wild-type, *ndj1* $\Delta$ and *csm4* $\Delta$ yeast strains

235  
236  
237

In order to gain insights into the possible roles of large-scale mechanical and organizational features of meiotic chromosomes on the process of pairing in a densely entangled nucleus, we carried out molecular dynamics simulations (**Fig 2**). Our simulation framework incorporated parameter values estimated from existing literature as detailed in Methods and used the LAMMPS platform [Thompson 2022] to model chromosome motion driven by Langevin random forces. In this model, chromosome polymers are represented as bead-spring chains, with the beads corresponding to polymer domains on the order of one persistence length. The nuclear envelope (NE) is represented as a confining sphere. To represent telomere attachment to the nuclear envelope, the initial and final beads on each chain are constrained to be on the nuclear sphere. To represent rapid telomere motion (RTM), large (relative to thermal) forces are applied to the initial and final nodes, as detailed in Methods. To represent entanglement, excluded volume interactions are modeled to prevent passage of polymers through each other.

238  
239  
240  
241  
242  
243  
244  
245  
246  
247  
248  
249  
250  
251

Using this framework, we carried out simulations in the presence of RTMs, as well as in two cases designed to represent well-studied mutants. In *csm4* $\Delta$  mutants, telomeres are attached to the NE but are not subject to cytoskeletal forces [Kosaka 2008]. We model this mutant by eliminating the simulated RTMs at the terminal nodes of the chains, such that all nodes of the chain are subject to the same standard thermal Langevin random force. In *ndj1* $\Delta$  mutants, telomeres are detached from the NE [Trelles-Sticken 2000], a situation that we model by removing the constraint for the nodes to be anchored on the NE, as well as eliminating the RTMs. We then compared these three simulations in order to determine how the presence of RTMs and/or NE

252  
253  
254  
255  
256  
257  
258  
259  
260



attachment might influence the pairing process. As shown in (Fig 3A), the result was that homolog pairing in both simulated mutants progressed with approximately the same kinetics as wildtype (WT). This result is inconsistent with the currently available experimental data which shows that entry into anaphase is delayed in the RTM deficient strains [Conrad 2012], presumably due to slower pairing.

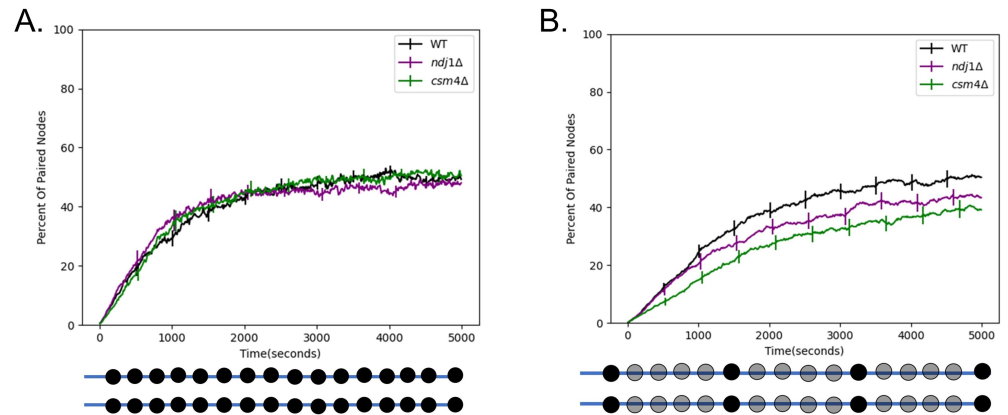

**Fig 3.** Rapid telomere movement accelerates homologous chromosome pairing. (A) Percent of paired nodes vs time for the case that pairing occurs along the entire chromosome. The mutant strains *ndj1Δ* and *csm4Δ* pair with the same kinetics as WT. (B) Percent of paired nodes vs time for the case that pairing sites are spread out along the chromosome. RTMs increase the rate of pairing of wildtype (WT) as compared to the mutant strains. Error bars indicate 95% confidence intervals.

The simulation in (Fig 3A) assumed that every node could pair with its homolog. In reality, the distribution of pairing sites will be dictated by the distribution of double strand breaks or other mediators of pairing. To see if our model would give different results if the density of pairing sites was reduced, we carried out a second set of simulations in which we uniformly space twenty pairing sites along the length of the chromosome. In the case where the pairing sites are spread out along the length of the chromosome, we find that the WT strain pairs the fastest, followed by *ndj1Δ*, followed by *csm4Δ* (Fig 3B). This is consistent with experimental data from [Conrad 2012] in which WT is seen to enter anaphase the fastest, followed by *ndj1Δ*, followed by *csm4Δ*.

Thus, using the more realistic distribution of pairing sites, we see that the rapid telomere movements experienced by WT cells do in fact speed up pairing relative to the RTM deficient strains. This result is consistent with the idea that a function of the RTMs is to increase collisions between homologous loci to speed up pairing.

### Meiotic bouquet speeds up pairing

RTMs are not the only unusual aspect of meiotic nuclear organization. A meiotic bouquet, in which the ends of the chromosomes cluster to a small region of the nuclear surface early in meiosis (Fig 4A), has been observed in a number of different organisms [Tomita 2006]. It has been hypothesized that the meiotic bouquet serves to physically align the chromosomes to reduce the search space and increase the pairing rate [Conrad 2007]. Still, the exact role of the meiotic bouquet remains unknown, largely due to the fact that mutants that impair the meiotic bouquet also impair RTM magnitude and frequency [Lee 2012].

To test whether the meiotic bouquet leads to an increase in pairing rates in our simulation, we ran simulations both in the presence and absence of a bouquet, which we

represent as an additional force on the telomeres biasing them to a sub-region of the nuclear surface. We then measure the number of paired nodes over time and plot the resulting time course. We find that the addition of a meiotic bouquet allows the chromosomes to pair faster relative to the case where there is no bouquet (**Fig 4B**). This result is consistent with the idea that the purpose of the meiotic bouquet is to physically align the chromosomes in order to speed up pairing.

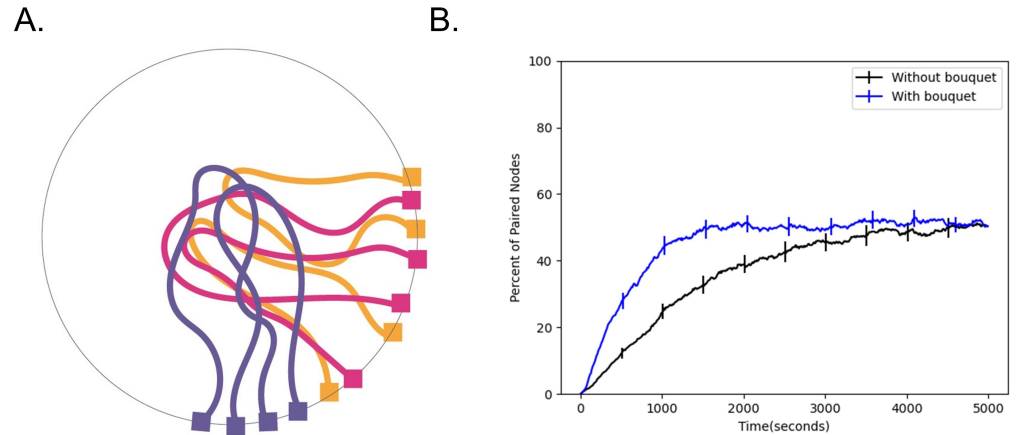

**Fig 4.** Effect of bouquet on pairing speed. (A) Cartoon schematic of the meiotic bouquet, an event in early prophase where the telomeres of chromosomes cluster together. (B) Percent of paired nodes vs. time in the presence and absence of a bouquet shows that pairing is achieved more rapidly in the presence of a bouquet. Error bars indicate 95% confidence intervals.

### Increase in nuclear size slows down pairing

Before the onset of meiosis, the nuclear volume increases dramatically (Fig 5A), often by a factor of at least two [Zickler 1977; Zickler and Kleckner 2015, Beasley 1938]. In the context of pairing, this increase in nuclear volume seems counterproductive since it gives the chromosomes a much larger search space in which they must find their homolog. In a previous study that used a phantom polymer model, [Marshall & Fung 2016] found that an increase in nuclear size reduced the speed at which chromosomes pair. Here, we wanted to test whether this remains true using our updated model which includes excluded volume. Our rationale is that excluded volume effects can increase the effective friction in dense polymer networks, so that in principle, it may be advantageous to dilute the polymer mixture by increasing the nuclear volume to drive faster diffusion and thus faster pairing.

To determine whether this is the case, we ran pairing simulations at different nuclear radii (**Fig 5B**) ranging from 0.8 microns to 1.2 microns and plotted the number of paired nodes vs time. Consistent with previous simulations, we find that increasing the nuclear size slows down pairing, raising the question of why cells may have evolved to increase nuclear size during meiosis. We will revisit this question below.

### RTMs increase the number of cells with interlocks remaining

Our initial results support the idea that rapid telomere motion functions to speed up pairing. Another proposed function of the rapid telomere movements may be to pull apart already paired regions of the chromosome in order to resolve interlocks (**Fig 1D**). A recent study in the organism *Arabidopsis thaliana* found evidence for this idea

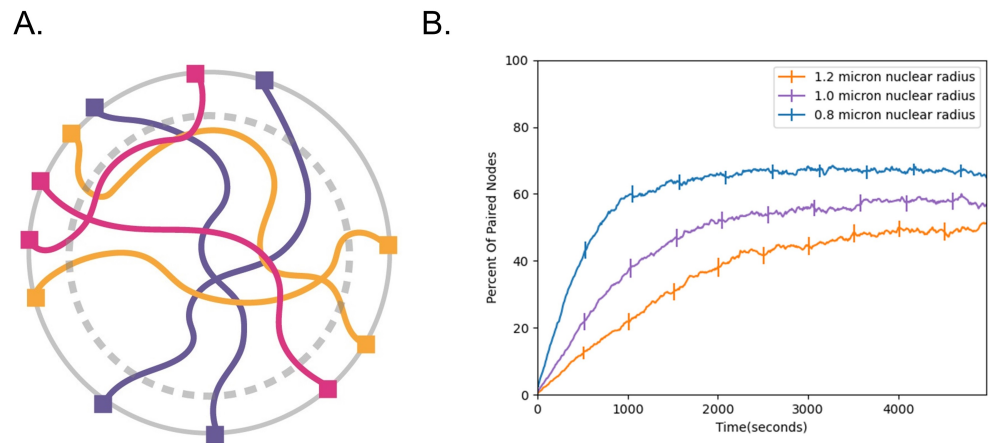

**Fig 5.** Effect of nuclear volume increase on pairing speed. (A) Cartoon schematic of nuclear volume increase. Gray dashed circle represents the original nuclear boundary. (B) Percent of paired nodes vs. time for three nuclear radii shows that pairing is progressively slower as the nuclear radius is increased. Error bars indicate 95% confidence intervals.

[Martinez-Garcia 2018]. The authors report that the chromosome movement deficient mutant *nup136* $\Delta$  had greater numbers of interlocks remaining after synapsis. 318

With this in mind, we tested whether rapid telomere movements contribute to interlock resolution using our model. First, we noted that the two types of interlocks previously described [Martinez-Garcia 2018, Wang 2009], open and closed, are both seen in our simulations (**Fig 6A**). We then ran simulations of our three in silico strains: WT, *ndj1* $\Delta$ , and *csn4* $\Delta$ . Since only the WT strain experiences the rapid telomere pulls, we expected that if the RTMs were involved in interlock resolution, then we should see an increase in the percentage of cells with interlocks remaining in the two simulated mutant strains. 319 320 321 322 323 324 325 326 327

Surprisingly, we see the opposite result, with a greater percentage of the simulated WT cells having interlocks remaining after the completion of pairing relative to the two RTM deficient strains (**Fig 6B**). 328 329 330

The increase in interlocks seen in the presence of RTMs could either mean that interlocks form more readily, or that they fail to be resolved. The simulations described thus far capture both possibilities, because we initialized the chromosomes in an initially unpaired random orientation inside the nucleus, allowed them to pair, then assessed each cell for the existence of an interlock at the end of each simulation. It has been postulated that RTMs could help resolve interlocks by pulling chromosomes away from each other, suggesting that perhaps we were seeing a competition between increased interlock formation and increased interlock resolution, which would predict that in the presence of RTMs, interlocks should resolve more readily once they form. 331 332 333 334 335 336 337 338 339

In order to specifically test the influence of RTMs on interlock resolution, we initialized each simulation in an already paired, random, interlocked configuration, either open (**Fig 6C**) or closed (**Fig 6D**). At  $t=0$  we run the simulation forward in time for two hours and then at the end of the simulation we assess whether the interlock is still there. This experiment tells us about the probability of an interlock resolving in each condition after a set amount of time. In both cases, loss of RTMs leads to a decrease in interlocks, suggesting that RTMs normally impede interlock resolution. The effect was much stronger on closed interlocks. 340 341 342 343 344 345 346 347

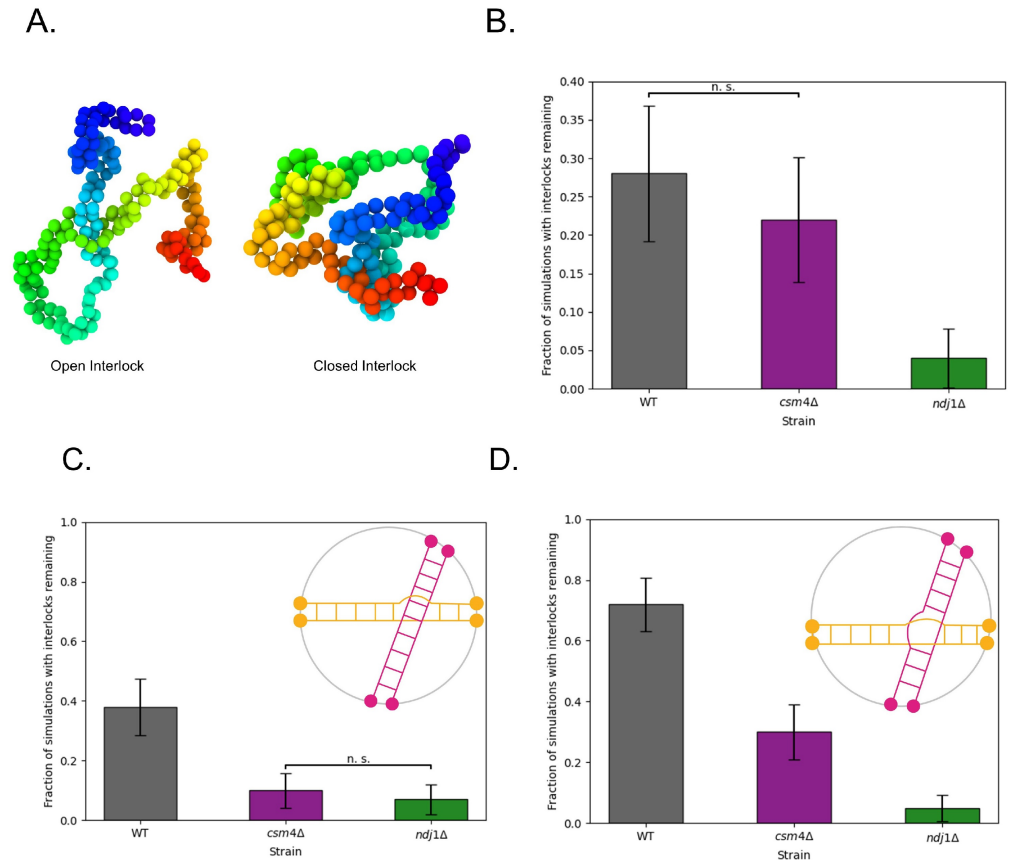

**Fig 6.** Role of RTMs on interlocks. (A) Model captures both types of interlocks that are known to occur experimentally. (B) Loss of RTMs leads to a greater percentage of cells with interlocks. (C) Resolution of Open Interlocks. Graph shows percent of simulations with interlocks remaining after ~ 2 hours in the case that chromosomes start in an open interlock configuration (upper right). (d) Percent of simulations with interlocks remaining after ~ 2 hours in the case that chromosomes start in a closed interlock configuration (upper right). Error bars indicate 95% confidence intervals.

### Effect of single-end attachment

Our simulations in (Fig 6) indicate that fewer interlocks are observed when telomeres are detached from the NE. This result suggests that one way to avoid interlocks is to have detached telomeres, but then the potential benefits of RTMs for accelerating pairing would be lost. In one well studied model system for meiosis, *C. elegans*, only one end of each chromosome is attached to the nuclear envelope (Fig 7A) [Rog & Dernburg 2013], raising the question of whether having one chromosome end attached to the NE to experience RTMs, while the other is detached to avoid interlocks, might be an optimal strategy. We simulated this situation of a single attached end and found a dramatic reduction in the percentage of cells with interlocks in the case that only one end of the chromosomes is attached to the nuclear envelope. (Fig 7C). We note that this reduction in interlocks comes at the cost of slightly slower pairing compared to when both ends are attached (Fig 7B).

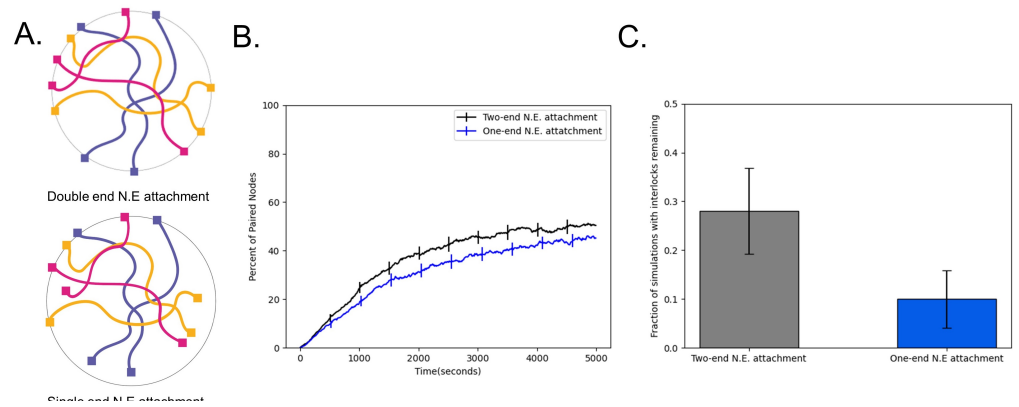

**Fig 7.** Single-end attachment facilitates interlock resolution. (A) Cartoon schematic of double end vs. single end chromosome attachment to the NE (B) Percent of paired nodes vs. time for single end vs. double end chromosome attachment shows an increase in pairing speed with both ends attached. (C) Percent of simulations with interlocks remaining for single end vs double end chromosome attachment shows a greater number of cells with interlocks remaining in the case where both ends are attached to the N.E. Error bars indicate 95% confidence intervals.

### The meiotic bouquet does not significantly alter the number of cells with interlocks remaining

While we already showed in a previous section that the meiotic bouquet speeds up pairing in our model, we also sought to investigate whether the meiotic bouquet had any effect on the number of cells with interlocked chromosomes at the end of pairing.

To do this, we run two sets of simulations, one with a bouquet, and one without a bouquet. For each case, we run full pairing simulations of pairing and count the number of simulations in which there are interlocks at the end as discussed in the methods section. We find that the meiotic bouquet does not significantly change the percentage of cells in which there are interlocks (Fig 8A).

### Increasing the nuclear size reduces the number of interlocks:

When polymers are densely packed in a finite volume, they become entangled. For example, it is well established that the probability of polymer knotting is a function of the size of the container that the polymer is enclosed in [Dai & Doyle 2018]. Studies have found that the probability of knotting sharply increases with increasing confinement in both linear polymers [Dai & Doyle 2018], and random ring polymers [Micheletti 2006]. These studies suggest that the nuclear volume, in addition to its effects on pairing collisions reported above, might also affect the degree of entanglement between chromosomes, leading to an effect on the number of interlocks that occur. A large nucleus would be predicted to form fewer interlocks during pairing.

To test this prediction, we calculated the number of cells with topological interlocks between chromosomes at the end of the simulation, and found that while larger nuclei lead to slower pairing kinetics, the increased volume does in fact lead to a dramatic reduction in the number of interlocks (Fig 8B).

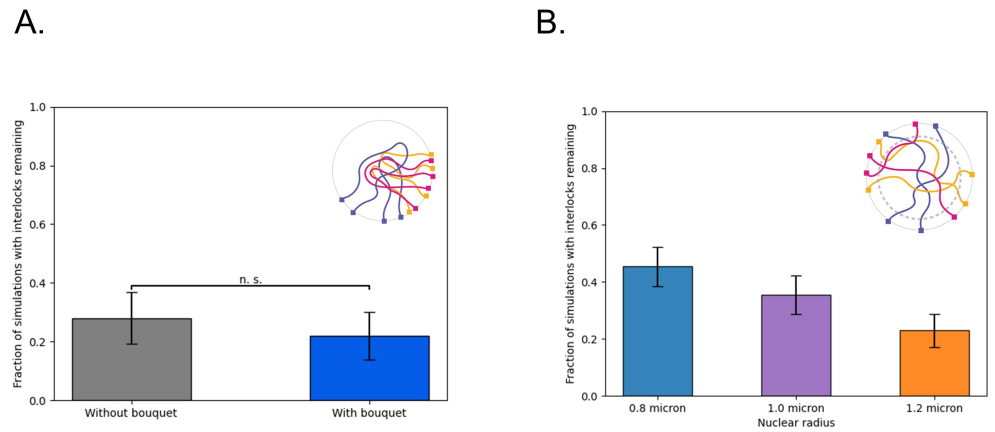

**Fig 8.** Effect of bouquet and nuclear volume increase on interlocks. (a) Percent of simulations with interlocks remaining in the presence and absence of a meiotic bouquet shows that the number of interlocks does not change significantly in the presence of a bouquet. (b) Percent of simulations with interlocks remaining at three different nuclear radii shows that increasing the nuclear volume decreases the number of cells with interlocks. Error bars indicate 95% confidence intervals.

**In the absence of strand passage, interlock resolution proceeds in three sequential steps: interlock migration, followed by telomere unpairing, then by diffusive unwinding**

Interlocks are commonly observed in meiosis, but eventually resolve by the pachytene stage [Rasmussen 1980, Zickler 1977, von Wettstein 1984, Martinez-Garcia 1977, Wang 2009]. Our model recapitulates this formation and resolution of interlocks, but it is not obvious a priori how such interlocks in linear polymers are able to resolve simply from a combination of reversible pairing and random motion, with no mechanisms for strand breakage or for directed untangling. We therefore sought to understand the step-by-step process by which interlocks resolve in our model.

For every interlock that forms and eventually resolves, our model gives a timestep-by-timestep molecular dynamics trajectory that includes the velocity and position of every single node in the simulation. We can then use tools such as Ovito [Stukowski 2009] to visualize and animate these trajectories into interactive molecular movies where we can pan, zoom, rotate, hide nodes, etc. This gives us a powerful tool for studying the resolution of interlocks because otherwise, the highly dense, confined, thermally driven polymer system would look like a tangled mess.

To see exactly how interlocks resolved, we visually studied the trajectories of these interlock resolution events. (Fig 9A) shows a representative example of an interlock resolution event which we further simplify in Fig 9B. We note that there is a meiotic bouquet in this example for visual simplicity, but the process is exactly the same in the absence of a bouquet.

We find that interlocks can occur anywhere along the length of the chromosome, but because the ends are tethered to the nuclear envelope, the chromosome endpoints are the only places an interlock can resolve (Fig 9C). This means the interlock must first migrate towards the telomeres on the NE (Fig 9C), where it is then held in a semi-stable state by the large number of paired nodes on one side. To fully resolve an interlock, two additional steps must sequentially take place. First, the telomeric regions of the paired chromosomes must unpair (Fig 9C). This presents an opportunity for

interlock resolution. Next, the telomeres of the interlocked strand must diffusively unwind itself around the other telomeres for the interlock to fully resolve. Typically, interlock resolution is then followed by rapid zippering of the remaining unpaired strands (**Fig 9C**) making the disentanglement effectively an irreversible process.

414  
415  
416  
417

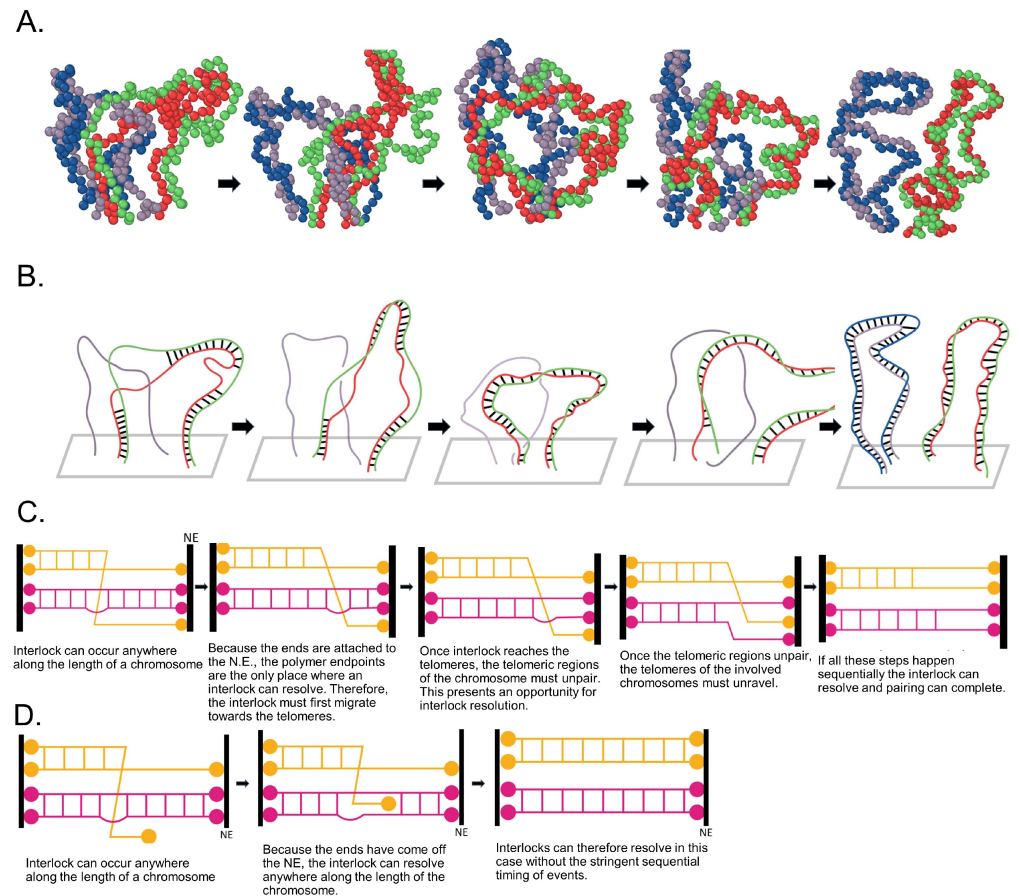

**Fig 9.** Geometry of interlock resolution. A) Simulation results showing interlock migration to telomeres followed by complete resolution. (B) Simplified drawing of the same interlock resolution event showing graduate migration of the interlock to the end, after which telomere re-arrangement leads to the blue chromosome becoming disentangled from the red/green paired chromosome. (C) Cartoons of steps required for interlock resolution with both ends are attached to the NE (D) Cartoon representation of steps required for interlock resolution if at least one end of the chromosomes is unattached.

## Discussion

418

419

### **In the absence of strand passage, attachment of both ends of the telomeres to the NE means interlock resolution can only occur at the polymer endpoints**

420

421

422

One important realization from our model is that if both ends of the chromosomes are tethered to the nuclear envelope, then interlock resolution of the form we described can only occur at the chromosome endpoints. This realization came, in part, from looking at diagrams describing the resolution of knots in a simplified model of knot formation described in [Raymer & Smith 2007]. In this study, the authors look at the probability of knot formation in a system that consists of linear polymers confined to move inside of a confining volume. They note that knot formation and resolution of knots occurs when a single polymer end weaves through a parallel section of the surrounding strands, a move the authors call a “braid move”. We note that in our system, the polymers are under an additional constraint that makes a braid move much more difficult: namely, that the ends of the polymers are attached to the confining surface. In this case, a polymer end cannot weave through the surrounding strands, instead a braid move can only occur if at least two polymer endpoints weave around each other, an important distinction.

423

424

425

426

427

428

429

430

431

432

433

434

435

The biological implication of this is that in organisms where both ends of the chromosome are tethered to the NE, an interlock that resolves in this way must do so near the nuclear envelope.

436

437

438

### **Can topoisomerases catalyze strand passage during meiosis?**

439

One possible way to resolve interlocks could be to pass the chromatin strands through each other. In other parts of the cell cycle when chromosomes consist of a single double strand of DNA this reaction is easily catalyzed by topoisomerases such as topo II, which are known to temporarily cut double stranded DNA while allowing a strand to pass another strand through the resulting gap [Burden & Osheroff 1998]. While it is true that topoisomerases are upregulated during meiosis [Zhang 2014], at this stage of the cell cycle each chromosome consists of two sister chromatids which are bound together along their length. In order to pass strands through each other then, a topoisomerase would have to pass two double helices through another pair of double helices, which to our knowledge is not a known activity of topoisomerases. The function of topoisomerase may be irrelevant anyway given that the chromosomes are organized around a filamentous protein axial element, which is not a substrate for breakage by topo II. While it has been reported that topoisomerase plays a role in the resolution of interlocks [Martinez-Garcia 2008], it cannot be ruled out that this reflects an indirect effect of topo II, perhaps a result of chromatin reorganization, rather than from the direct resolution of interlocks via strand passage. In fact, a recent paper shows that topo II is required for meiotic double stranded break repair progression, where it is thought to relieve stress caused by supercoiling [Martinez-Garcia 2021]. As discussed in the introduction, the presence of an axial element during pairing would further prevent passage of one chromosome through another.

440

441

442

443

444

445

446

447

448

449

450

451

452

453

454

455

456

457

458

459

In light of these problems with the idea of topoisomerase catalyzed interlock resolution, an important result of our model is that under the physical constraints experienced by meiotic chromosomes, interlock resolution can occur just from reversible pairing coupled with random motion.

460

461

462

463



## Is the detachment of the telomeres from the NE a strategy for interlock resolution in any organism?

Our model shows that it is possible to resolve interlocks without any strand passage catalyzed by enzymatic activity, and that this process can be dramatically enhanced if one or both ends of the chromosomes come unattached from the nuclear envelope. Some organisms such as *C. elegans* only have one end of the chromosomes attached by default. Our results suggest that this configuration may help to avoid interlocks but could lead to slower pairing. However, given that *C. elegans* carries out pairing via dedicated pairing centers located close to the attachment point [Phillips 2009; Tsai 2011; Rog & Dernburg 2013], RTMs applied at the attached end could be sufficient to speed pairing, and increased motion of the other end, far from the pairing center, would be less relevant anyway.

The large effect on interlock reduction of chromosome end detachment raises the question of whether in some organisms, in which both ends of the telomeres are typically attached to the NE, transient detachment might still occur in order to resolve interlocks. In support of this theory, it has been reported [Rasmussen & Holm 1980] that in lily meiocytes 14 out of 48 telomeres were not associated with the NE at early zygotene. While *lilium* is no longer a widely used organism in the study of meiotic pairing, our results coupled with this historical observation motivate future experiments in which the telomeric ends are closely monitored for transient departure from the NE. Given that in most systems, the telomeres appear to be attached to the NE almost all of the time, it is not likely that the detachment would last long enough for the chromosomes to undergo extensive long-range motion such as reptation. Instead, we imagine that a transient detachment could provide a rapid way to carry out the final step in interlock resolution, once the interlock has migrated near the NE, by allowing the captured chromosome to escape the interlock (Fig 9D).

## Why is *csm4*Δ a more deleterious mutation than *ndj1* Δ ?

A perhaps surprising result from genetic experiments is the fact that *csm4*Δ is a more deleterious mutation than *ndj1*Δ, both in the time required for entry into anaphase [Lee 2012] and in terms of spore viability [Wanat 2008], which is opposite to the order of their phenotypic effects on chromosome organization. While both mutations disable the rapid telomere pulls, in the *ndj1*Δ strain the ends of the chromosomes come completely detached from the nuclear envelope, while in the *csm4*Δ strain the ends remain attached. *ndj1*Δ would appear to be the more dramatic mutation. Why then is the *ndj1*Δ mutant more viable than *csm4*Δ?

A key methodological feature of our model is the representation of these strains in silico, which was accomplished by matching the velocities of our telomeres to the experimentally measured velocities of the telomeric ends. While building the model we noted that the *csm4*Δ strain has a much lower average telomere velocity than the WT cell. It appears that in the absence of the rapid telomere pulls, the ends of the chromosomes are effectively tethered to a particular place on the nuclear envelope, from which they diffuse very slowly. This extreme tethering of the telomeric ends to the nuclear envelope could in principle highly constrain the search process for homologous pairing, thereby impeding the completion of homologous pairing and synapsis.

This observation sheds light on why (in the absence of RTMs) it might actually be better to completely detach the chromosome ends from the nuclear envelope. Once the telomeres are detached from the NE in the *ndj1*Δ strain, the telomeric ends are free to diffuse throughout the nucleus at the same diffusion coefficient of meiotic chromatin, thereby releasing the spatial constraints on the homologous search process.

## Coarse-grained molecular dynamics modeling of meiosis

The inspiration for our model came from an earlier model where [Marshall & Fung 2016, Marshall & Fung 2019] used a similar bead spring polymer model to study meiotic chromosome pairing. This model represents an update on the previous model with two important improvements: 1) We created this model using Lammmps, a popular framework for building molecular dynamics models. Lammmps is open source and maintained by an active academic community which provides pre-built executables that are easy to install. This means anyone can run our simulations using the included initialization files. 2) This updated model includes excluded volume, which means polymers cannot pass through each other. This is what allowed us to be able to study the resolution of interlocks, something that would not have been possible using our previous model.

While there are other physical models of meiotic pairing, our model is unique in that it attempts to capture the large-scale cell biological picture of meiotic pairing including the random initial 3D search, the rapid telomere motion, and additional physical constraints such as telomere attachment to the NE.

A recent model by [Garcia 2021] for example, is focused on somatic pairing in *Drosophila* rather than meiotic pairing. The authors use a kinetic Monte Carlo scheme to show that a “button-based” pairing mechanism in which the pairing sites are spread out along the length of the chromosome can recapitulate chromosome-wide pairing. This is consistent with our previous results that widely spaced pairing sites function effectively to promote pairing [Marshall and Fung 2016], which we have now found also applies in our more realistic model with excluded volume (**Fig 3B**). Because the authors were modelling somatic pairing rather than meiotic pairing, their model does not include the meiosis specific constraints like our model.

Another recent model by [Newman 2021], is focused on capturing the signature of physical confinement in loci along paired chromosomes. They thus employ a Rouse polymer model where pairing along the polymer chains occurs via the forced creation of random dynamic linkages, rather than from a search process as it occurs in our model.

Another model by [Takao 2019] is focused on capturing the dramatic horsetail movements observed in *S. pombe*. In this study, the authors focus on the prealignment and sorting of simulated chromosomes, and thus their model does not include physical linking of paired loci.

A model by [Penfold 2012] used Markov chain Monte Carlo sampling to show that the meiotic bouquet led to homologous juxtaposition, a result that is consistent with our current results which show that the meiotic bouquet physically aligns the chromosomes to speed up pairing (**Fig 4b**). Their model however, did not include excluded volume interactions or physical linking of pairing loci.

We note that the method used to achieve pairing in our model via the dynamic creation and destruction of harmonic springs was previously employed by [Khanna 2019] to crosslink simulated chromosomes. A bead-spring chain model similar to ours [Verdaasdonk 2013] was used to study chromatin domain formation and confinement, rather than meiotic pairing.

## Acknowledgments

We thank members of the Fung and Marshall labs for many helpful discussions, particularly Beth Rockmill and Mike Pollard. This work was funded by NIH grants 5R01GM137126 (JCF), R35 GM130327 (WFM) and NSF DBI-1548297 (WFM, JCF).

## Fig Legends

**Fig 1.** The physical context of meiotic pairing. (A) Cartoon schematic of chromosome pairing (B) Cartoon schematic of nuclear confinement (C) Cartoon schematic of telomere attachment to the nuclear envelope (D) chromosome movement and proposed roles.

**Fig 2.** Simulating Meiotic Chromosome Pairing (A) To model meiotic chromosome pairing, we use bead spring polymers undergoing Langevin dynamics. (B) Model parameters used in the simulation.

**Fig 3.** Rapid telomere movement accelerates homologous chromosome pairing. (A) Percent of paired nodes vs time for the case that pairing occurs along the entire chromosome. The mutant strains *ndj1* $\Delta$  and *esm4* $\Delta$  pair with the same kinetics as WT. (B) Percent of paired nodes vs time for the case that pairing sites are spread out along the chromosome. RTMs increase the rate of pairing of wildtype (WT) as compared to the mutant strains. Error bars indicate 95% confidence intervals.

**Fig 4.** Effect of bouquet on pairing speed. (A) Cartoon schematic of the meiotic bouquet, an event in early prophase where the telomeres of chromosomes cluster together. (B) Percent of paired nodes vs. time in the presence and absence of a bouquet shows that pairing is achieved more rapidly in the presence of a bouquet. Error bars indicate 95% confidence intervals.

**Fig 5.** Effect of nuclear volume increase on pairing speed. (A) Cartoon schematic of nuclear volume increase. Gray dashed circle represents the original nuclear boundary. (B) Percent of paired nodes vs. time for three nuclear radii shows that pairing is progressively slower as the nuclear radius is increased. Error bars indicate 95% confidence intervals.

**Fig 6.** Role of RTMs on interlocks. (A) Model captures both types of interlocks that are known to occur experimentally. (B) Loss of RTMs leads to a greater percentage of cells with interlocks. (C) Resolution of Open Interlocks. Graph shows percent of simulations with interlocks remaining after  $\sim 2$  hours in the case that chromosomes start in an open interlock configuration (upper right). (d) Percent of simulations with interlocks remaining after  $\sim 2$  hours in the case that chromosomes start in a closed interlock configuration (upper right). Error bars indicate 95% confidence intervals.

**Fig 7.** Single-end attachment facilitates interlock resolution. (A) Cartoon schematic of double end vs. single end chromosome attachment to the NE (B) Percent of paired nodes vs. time for single end vs. double end chromosome attachment shows an increase in pairing speed with both ends attached. (C) Percent of simulations with interlocks remaining for single end vs double end chromosome attachment shows a greater number of cells with interlocks remaining in the case where both ends are attached to the N.E. Error bars indicate 95% confidence intervals.

**Fig 8.** Effect of bouquet and nuclear volume increase on interlocks. (a) Percent of simulations with interlocks remaining in the presence and absence of a meiotic bouquet shows that the number of interlocks does not change significantly in the presence of a bouquet. (b) Percent of simulations with interlocks remaining at three different nuclear radii shows that increasing the nuclear volume decreases the number of cells with interlocks. Error bars indicate 95% confidence intervals.

**Fig 9.** Geometry of interlock resolution. A) Simulation results showing interlock migration to telomeres followed by complete resolution. (B) Simplified drawing of the same interlock resolution event showing graduate migration of the interlock to the end, after which telomere re-arrangement leads to the blue chromosome becoming disentangled from the red/green paired chromosome. (C) Cartoons of steps required for interlock resolution with both ends are attached to the NE (D) Cartoon representation of steps required for interlock resolution if at least one end of the chromosomes is unattached.

## References

1. Beasley JO. Nuclear Size in Relation to Meiosis. *Botanical Gazette*. 1938;99(4):865–71.
2. Brown MS, Zanders S, Alani E. Sustained and Rapid Chromosome Movements Are Critical for Chromosome Pairing and Meiotic Progression in Budding Yeast. *Genetics*. 2011 May 1;188(1):21–32.
3. Burden DA, Osheroff N. Mechanism of action of eukaryotic topoisomerase II and drugs targeted to the enzyme. *Biochimica et Biophysica Acta (BBA) - Gene Structure and Expression*. 1998 Oct 1;1400(1):139–54.
4. Chacón MR, Delivani P, Tolić IM. Meiotic Nuclear Oscillations Are Necessary to Avoid Excessive Chromosome Associations. *Cell Rep*. 2016 Nov 1;17(6):1632–45.
5. Chikashige Y, Ding DQ, Funabiki H, Haraguchi T, Mashiko S, Yanagida M, et al. Telomere-led premeiotic chromosome movement in fission yeast. *Science*. 1994 Apr 8;264(5156):270–3.
6. Child MB, Bateman JR, Jahangiri A, Reimer A, Lammers NC, Sabouni N, et al. Live imaging and biophysical modeling support a button-based mechanism of somatic homolog pairing in *Drosophila*. *eLife*. 2021 Dec 22;10:e64412.
7. Cobb J, Reddy RK, Park C, Handel MA. Analysis of expression and function of topoisomerase I and II during meiosis in male mice. *Molecular Reproduction and Development*. 1997;46(4):489–98.
8. Conrad MN, Lee C-Y, Chao G, Shinohara M, Kosaka H, Shinohara A, et al. Rapid Telomere Movement in Meiotic Prophase I Is Promoted By NDJ1, MPS3, and CSM4 and Is Modulated by Recombination. *Cell*. 2008 Jun 27;133(7):1175–87.
9. Conrad MN, Lee C-Y, Wilkerson JL, Dresser ME. MPS3 mediates meiotic bouquet formation in *Saccharomyces cerevisiae*. *PNAS*. 2007 May 22;104(21):8863–8.
10. Dai L, Doyle PS. Universal Knot Spectra for Confined Polymers. *Macromolecules*. 2018 Aug 28;51(16):6327–33.
11. de Gennes PG. Reptation of a Polymer Chain in the Presence of Fixed Obstacles. *J Chem Phys*. 1971 Jul 15;55(2):572–9.
12. Dekker J. Mapping in vivo chromatin interactions in yeast suggests an extended chromatin fiber with regional variation in compaction. *J Biol Chem*. 2008 Dec 12;283(50):34532–40.
13. Dekker J, Marti-Renom MA, Mirny LA. Exploring the three-dimensional organization of genomes: interpreting chromatin interaction data. *Nat Rev Genet*. 2013 Jun;14(6):390–403.
14. Hartsuiker E, Bähler J, Kohli J. The Role of Topoisomerase II in Meiotic Chromosome Condensation and Segregation in *Schizosaccharomyces pombe*. *MBoC*. 1998 Oct 1;9(10):2739–50.

15. Heldrich J, Sun X, Vale-Silva LA, Markowitz TE, Hochwagen A. Topoisomerases Modulate the Timing of Meiotic DNA Breakage and Chromosome Morphogenesis in *Saccharomyces cerevisiae*. *Genetics*. 2020 May 1;215(1):59–73.
16. Khanna N, Zhang Y, Lucas JS, Dudko OK, Murre C. Chromosome dynamics near the sol-gel phase transition dictate the timing of remote genomic interactions. *Nat Commun*. 2019 Jun 24;10(1):2771.
17. Kosaka H, Shinohara M, Shinohara A. Csm4-Dependent Telomere Movement on Nuclear Envelope Promotes Meiotic Recombination. *PLOS Genetics*. 2008 Sep 26;4(9):e1000196.
18. Koszul R, Kim KP, Prentiss M, Kleckner N, Kameoka S. Meiotic Chromosomes Move by Linkage to Dynamic Actin Cables with Transduction of Force through the Nuclear Envelope. *Cell*. 2008 Jun 27;133(7):1188–201.
19. Koszul R, Kleckner N. Dynamic chromosome movements during meiosis: a way to eliminate unwanted connections? *Trends in Cell Biology*. 2009 Dec 1;19(12):716–24.
20. Lee C-Y, Conrad MN, Dresser ME. Meiotic Chromosome Pairing Is Promoted by Telomere-Led Chromosome Movements Independent of Bouquet Formation. *PLoS Genet*. 2012 May 24;8(5):e1002730.
21. Lu BC. Spreading the synaptonemal complex of *Neurospora crassa*. *Chromosoma*. 1993 Jul 1;102(7):464–72.
22. Lui DY, Cahoon CK, Burgess SM. Multiple Opposing Constraints Govern Chromosome Interactions during Meiosis. *PLOS Genetics*. 2013 Jan 17;9(1):e1003197.
23. Lui DY, Colaiácovo MP. Meiotic Development in *Caenorhabditis elegans*. In: Schedl T, editor. *Germ Cell Development in C elegans* [Internet]. New York, NY: Springer; 2013 [cited 2021 Dec 14]. p. 133–70. (Advances in Experimental Medicine and Biology). Available from: [https://doi.org/10.1007/978-1-4614-4015-4\\_6](https://doi.org/10.1007/978-1-4614-4015-4_6)
24. Marshall WF, Straight A, Marko JF, Swedlow J, Dernburg A, Belmont A, et al. Interphase chromosomes undergo constrained diffusional motion in living cells. *Curr Biol*. 1997 Dec 1;7(12):930–9.
25. Marshall WF, Fung JC. Modeling meiotic chromosome pairing: nuclear envelope attachment, telomere-led active random motion, and anomalous diffusion. *Phys Biol*. 2016 Apr;13(2):026003.
26. Marshall WF, Fung JC. Modeling meiotic chromosome pairing: a tug of war between telomere forces and a pairing-based Brownian ratchet leads to increased pairing fidelity. *Phys Biol*. 2019 May;16(4):046005.
27. Martinez-Garcia M, Schubert V, Osman K, Darbyshire A, Sanchez-Moran E, Franklin FCH. TOP11 and chromosome movement help remove interlocks between entangled chromosomes during meiosis. *J Cell Biol*. 2018 Dec 3;217(12):4070–9.

28. Martinez-Garcia M, White CI, Franklin FCH, Sanchez-Moran E. The Role of Topoisomerase II in DNA Repair and Recombination in *Arabidopsis thaliana*. *Int J Mol Sci*. 2021 Dec 4;22(23):13115.
29. Micheletti C, Marenduzzo D, Orlandini E, Sumners DW, Summers DW. Knotting of random ring polymers in confined spaces. *J Chem Phys*. 2006 Feb 14;124(6):64903.
30. Miné-Hattab J, Rothstein R. Increased chromosome mobility facilitates homology search during recombination. *Nat Cell Biol*. 2012 May;14(5):510–7.
31. Newman TAC, Beltran B, McGehee JM, Elnatan D, Cahoon CK, Paddy MR, et al. Homologous locus pairing is a transient, diffusion-mediated process in meiotic prophase [Internet]. 2021 Apr [cited 2021 Dec 11] p. 2021.04.23.440859. Available from: <https://www.biorxiv.org/content/10.1101/2021.04.23.440859v1>
32. Paquay S, Kusters R. A Method for Molecular Dynamics on Curved Surfaces. *Biophysical Journal*. 2016 Mar 29;110(6):1226–33.
33. Pattabiraman D, Roelens B, Woglar A, Villeneuve AM. Meiotic recombination modulates the structure and dynamics of the synaptonemal complex during *C. elegans* meiosis. *PLOS Genetics*. 2017 Mar 24;13(3):e1006670.
34. Penfold CA, Brown PE, Lawrence ND, Goldman ASH. Modeling Meiotic Chromosomes Indicates a Size Dependent Contribution of Telomere Clustering and Chromosome Rigidity to Homologue Juxtaposition. *PLOS Computational Biology*. 2012 May 3;8(5):e1002496.
35. Phillips CM, Meng X, Zhang L, Chretien JH, Urnov FD, Dernburg AF. Identification of Chromosome Sequence Motifs That Mediate Meiotic Pairing and Synapsis in *C. elegans*. *Nat Cell Biol*. 2009 Aug;11(8):934–42.
36. Rao HB, Shinohara M, Shinohara A. Mps3 SUN domain is important for chromosome motion and juxtaposition of homologous chromosomes during meiosis. *Genes Cells*. 2011 Nov;16(11):1081–96.
37. Rasmussen SW, Holm PB. Mechanics of meiosis. *Hereditas*. 1980;93(2):187–216.
38. Raymer DM, Smith DE. Spontaneous knotting of an agitated string. *PNAS*. 2007 Oct 16;104(42):16432–7.
39. Rog O, Dernburg AF. Chromosome pairing and synapsis during *Caenorhabditis elegans* meiosis. *Current Opinion in Cell Biology*. 2013 Jun 1;25(3):349–56.
40. Rose D, Holm C. Meiosis-specific arrest revealed in DNA topoisomerase II mutants. *Mol Cell Biol*. 1993 Jun;13(6):3445–55.
41. Sato A, Isaac B, Phillips CM, Rillo R, Carlton PM, Wynne DJ, et al. Cytoskeletal Forces Span the Nuclear Envelope to Coordinate Meiotic Chromosome Pairing and Synapsis. *Cell*. 2009 Nov 25;139(5):907–19.
42. Scherthan H. Telomeres and meiosis in health and disease. *Cell Mol Life Sci*. 2007 Jan 1;64(2):117–24.

43. Scherthan H, Wang H, Adelfalk C, White EJ, Cowan C, Cande WZ, et al. Chromosome mobility during meiotic prophase in *Saccharomyces cerevisiae*. *Proc Natl Acad Sci U S A*. 2007 Oct 23;104(43):16934–9.
44. Schneider T, Stoll E. Molecular-dynamics study of a three-dimensional one-component model for distortive phase transitions. *Phys Rev B*. 1978 Feb 1;17(3):1302–22.
45. Sikorav JL, Jannink G. Kinetics of chromosome condensation in the presence of topoisomerases: a phantom chain model. *Biophys J*. 1994 Mar;66(3 Pt 1):827–37.
46. Starr DA, Fridolfsson HN. Interactions Between Nuclei and the Cytoskeleton Are Mediated by SUN-KASH Nuclear-Envelope Bridges. *Annu Rev Cell Dev Biol*. 2010;26:421–44.
47. Stukowski A. Visualization and analysis of atomistic simulation data with OVITO—the Open Visualization Tool. *Modelling Simul Mater Sci Eng*. 2009 Dec;18(1):015012.
48. Syrjänen JL, Heller I, Candelli A, Davies OR, Peterman EJG, Wuite GJL, et al. Single-molecule observation of DNA compaction by meiotic protein SYCP3. van Oijen AM, editor. *eLife*. 2017 Mar 13;6:e22582.
49. Takao K, Takamiya K, Ding D-Q, Haraguchi T, Hiraoka Y, Nishimori H, et al. Torsional Turning Motion of Chromosomes as an Accelerating Force to Align Homologous Chromosomes during Meiosis. *J Phys Soc Jpn*. 2019 Feb 15;88(2):023801.
50. Thompson AP, Aktulga HM, Berger R, Bolintineanu DS, Brown WM, Crozier PS, et al. LAMMPS - a flexible simulation tool for particle-based materials modeling at the atomic, meso, and continuum scales. *Computer Physics Communications*. 2022 Feb 1;271:108171.
51. Tomita K, Cooper JP. The Meiotic Chromosomal Bouquet: SUN Collects Flowers. *Cell*. 2006 Apr 7;125(1):19–21.
52. Trelles-Sticken E, Dresser ME, Scherthan H. Meiotic Telomere Protein Ndj1p Is Required for Meiosis-Specific Telomere Distribution, Bouquet Formation and Efficient Homologue Pairing. *Journal of Cell Biology*. 2000 Oct 2;151(1):95–106.
53. Tsai J-H, McKee BD. Homologous pairing and the role of pairing centers in meiosis. *J Cell Sci*. 2011 Jun 15;124(Pt 12):1955–63.
54. Verdaasdonk JS, Vasquez PA, Barry RM, Barry T, Goodwin S, Forest MG, et al. Centromere Tethering Confines Chromosome Domains. *Molecular Cell*. 2013 Dec 26;52(6):819–31.
55. Voelkel-Meiman K, Moustafa SS, Lefrançois P, Villeneuve AM, MacQueen AJ. Full-length synaptonemal complex grows continuously during meiotic prophase in budding yeast. *PLoS Genet*. 2012;8(10):e1002993.
56. von Wettstein D. The synaptonemal complex and genetic segregation. *Symp Soc Exp Biol*. 1984;38:195–231.

57. Wanat JJ, Kim KP, Koszul R, Zanders S, Weiner B, Kleckner N, et al. Csm4, in Collaboration with Ndj1, Mediates Telomere-Led Chromosome Dynamics and Recombination during Yeast Meiosis. *PLOS Genetics*. 2008 Sep 26;4(9):e1000188.
58. Wang C-JR, Carlton PM, Golubovskaya IN, Cande WZ. Interlock formation and coiling of meiotic chromosome axes during synapsis. *Genetics*. 2009 Nov;183(3):905–15.
59. West AM, Rosenberg SC, Ur SN, Lehmer MK, Ye Q, Hagemann G, et al. A conserved filamentous assembly underlies the structure of the meiotic chromosome axis. Tyler JK, de Massy B, editors. *eLife*. 2019 Jan 18;8:e40372.
60. Zhang L, Wang S, Yin S, Hong S, Kim KP, Kleckner N. Topoisomerase II mediates meiotic crossover interference. *Nature*. 2014 Jul 31;511(7511):551–6.
61. Zickler D. Development of the synaptonemal complex and the “recombination nodules” during meiotic prophase in the seven bivalents of the fungus *Sordaria macrospora* Auersw. *Chromosoma*. 1977 Dec 1;61(4):289–316.
62. Zickler D, Kleckner N. Recombination, Pairing, and Synapsis of Homologs during Meiosis. *Cold Spring Harb Perspect Biol*. 2015 May 18;7(6):a016626.
